## Entrusting “Attitudes” in the K/S/A of Bedside Cardiac Assessment

### **Entrusting “Attitudes” in the K/S/A of Bedside Cardiac Assessment**

James L. Meisel, MD, MHPE, Deborah Navedo, PhD, CPNP, FNAP, Isaac O. Opole, MD, PhD, Daniel C. R. Chen, MD, MSc, Gail March Cohen, PhD, MFA, Sheilah A. Bernard, MD, Hugo Carmona, MD, Emil R. Petrusa, PhD, Ahmed H. Nahas, MD, Carly M. Eiduson, Nick Papps, MBA

J.L. Meisel is Associate Chief of Staff for Education, VA Bedford Healthcare System, Bedford MA and Associate Professor of Medicine, Dept. of Medicine, Boston University School of Medicine, Boston, MA; ORCID: <https://orcid.org/0000-0001-5608-0175>

D. Navedo is Director of Education, STRATUS Center for Simulation, Brigham and Women's Hospital, Boston, MA; ORCID: <https://orcid.org/0000-0002-3225-1336>

I.O. Opole is Professor of Internal Medicine, Department of Internal Medicine, University of Kansas Medical Center, Kansas City, KS; ORCID: <https://orcid.org/0000-0002-6357-0196>

D.C.R. Chen is Assistant Dean for Student Affairs and Assistant Professor of Medicine, Dept. of Medicine, Boston University School of Medicine, Boston, MA; ORCID: <https://orcid.org/0000-0001-6672-6814>

G. March Cohen is Assistant Director, Educational Science and Initiatives, Brigham and Women's Hospital, Boston, MA; ORCID: <https://orcid.org/0000-0003-0191-0797>

S.A. Bernard is Associate Professor of Medicine, Dept. of Medicine, Boston University School of Medicine, Boston, MA; ORCID: <https://orcid.org/0000-0001-9394-1448>

## Entrusting “Attitudes” in the K/S/A of Bedside Cardiac Assessment

H. Carmona is Assistant Professor of Medicine, Division of Pulmonary, Critical Care and Sleep Medicine, University of Washington, Seattle, WA; ORCID: <https://orcid.org/0000-0002-5252-4821>

E.R. Petrusa is Professor of Surgery, Harvard Medical School; Department of Surgery, Learning Lab, Massachusetts General Hospital, Boston, MA; ORCID: <https://orcid.org/0000-0002-7482-0402>

A.H. Nahas was Geriatric Medicine Fellow, Veterans Health Administration, New England Geriatrics Research, Education, and Clinical Center, VA Boston Health Care System, Boston, MA, at the time this article was written

C.M. Eiduson is a medical student, University of Rochester School of Medicine & Dentistry, Rochester, NY

N. Papps is a multimedia producer, Synchro Agency, Canton, MA

Correspondence should be sent to James L. Meisel, Associate Chief of Staff for Education, Office of Academic Programs and Health Professions Education, Mailstop 151b, VA Bedford Healthcare System, 200 Springs Road, Bedford, MA 01730. Email [jameisel@bu.edu](mailto:jameisel@bu.edu).

## Entrusting “Attitudes” in the K/S/A of Bedside Cardiac Assessment

### **ABSTRACT**

#### **Problem**

In the competency-based medical education literature, investigators have typically discussed notions of trust in the context of entrustment decision-making rather than as attitudes within competency frameworks. Complementarity between concepts of entrustable professional activities and of competencies created an opportunity to infuse the latter with notions of trust.

Bedside cardiac assessment (BCA) exemplified one such competency. Traditional approaches to teaching and learning BCA addressed relevant knowledge and skills but not attitudes. We conceptualized entrustability as part of an attitudinal approach to teaching and learning BCA more holistically and effectively. The purpose of this thematic analysis was to explore students’ experience, in a medicine clerkship at one U.S. medical school, of participating in a newly developed BCA curriculum that aimed to foster attitudinal growth and a holistic approach to clinical learning.

#### **Approach**

Building upon Teaching for Understanding and conceptual change frameworks, the authors developed a flipped class curriculum utilizing pre-class short online videos and practice exercises followed by in-class activities and reflective discussions. Using a combination of content analysis and thematic analysis methodology of open-ended questionnaires administered from November 2017 to June 2018, the authors analyzed the experiences of medical students at one of the schools at which the curriculum was implemented.

## Entrusting “Attitudes” in the K/S/A of Bedside Cardiac Assessment

### **Outcomes**

Thematic analysis suggested learning strategies were effective and that peer encounters, skills practice, and encounters with educators were meaningful. The analysis also revealed opportunities to improve the original instructional design.

### **Next Steps**

The authors will incorporate feedback into future iterations of the curriculum and make it widely available to better study its impact on learners’ abilities; entrustability as a construct; and transfer of learning from the classroom to the workplace. Further work is needed to clarify the value of incorporating notions of trust into competency frameworks. The authors intend this exploratory work to stimulate conversations around expanded roles of trustworthiness and entrustability in medical education.

## Entrusting “Attitudes” in the K/S/A of Bedside Cardiac Assessment

### PROBLEM

Notions of trust are foundational to the concept of competency-based medical education (CBME).<sup>1</sup> One such notion, entrustability, is typically discussed in the context of entrustment decision-making, an approach to assessment based on work or output, rather than as an attitude complementing knowledge and skills within a competency framework<sup>2</sup> (see Figure). Yet “without a competency framework to describe the spectrum of necessary physician abilities, the result might be...a definition [of the physician] based solely on [their] work or output...and thus potentially ignore...abilities required of the twenty-first century physician...”<sup>3</sup> Bedside cardiac assessment (BCA), which requires the integration of patients’ physiology, symptoms, signs, and social and psychological aspects of illness, exemplifies one such ability. When performed well, BCA also facilitates faster and more expedient diagnosis and improves the performance of diagnostic technology like focused cardiac ultrasound.<sup>4,5</sup> However, teaching and learning BCA is declining, and traditional, reductionist approaches address knowledge and skills<sup>4</sup> but not attitudes of the “K/S/A” domains. In this paper, we conceptualize entrustability as part of an attitudinal approach to teaching and learning BCA more holistically and effectively.

A competency is an observable, activity-related *ability* that integrates knowledge, skills, values, and attitudes. By contrast, an entrustable professional activity (EPA) is an essential *task* “..that a learner can be trusted to perform without direct supervision...once sufficient competence has been demonstrated,” which requires the integration of multiple competencies.<sup>3</sup> Overlap between these two concepts (Figure) creates an opportunity to infuse competency development with notions of trust and, by so doing, “...[counter] the notion of a check-box approach of CBME that has been said to reduce the medical profession to a series of superficial skills.”<sup>2</sup>

## Entrusting “Attitudes” in the K/S/A of Bedside Cardiac Assessment

Several of the Association of American Medical College’s Core Entrustable Professional Activities for Entering Residency (CEPAERs) are directly relevant to BCA: integrating the scientific foundations of medicine with clinical reasoning skills to guide history taking and physical examination (EPA 1), updating and prioritizing differential diagnoses (EPA 2), and communicating with patients or families to ensure pre- and post-procedure explanation (EPA 12).<sup>1</sup> In the authors’ view, competent BCA requires integration of not just knowledge of cardiac pathophysiology and skills such as cardiac auscultation, jugular venous pressure measurement, and clinical reasoning, but also self-aware attitudes associated with trustworthiness and entrustability such as understanding the importance of the patient’s perspective, symptoms, and predicament.<sup>1,6</sup>

The purpose of this study was to explore students’ experience of participating in a newly developed BCA curriculum that sought to foster attitudinal growth and a holistic approach to clinical learning.

## **APPROACH**

### **Instructional design of the curriculum**

To improve the teaching and learning of BCA as a fully developed competency, we developed a curriculum using constructivist learning theories that support learner development, acquisition of professional attitudes, and effective self-assessment in addition to traditional knowledge and skills. We explicitly incorporated notions of trust, asking learners to reflect upon the processes of learning and of communicating with patients. Its title, *Listen Before You Auscultate*,<sup>7</sup> asks the learner to hear the patient’s perspective, both empathically, as a human predicament; and diagnostically, as an element of the clinical history in diagnostic reasoning.

We built upon the Teaching for Understanding (TfU) framework, which helps learners go

## Entrusting “Attitudes” in the K/S/A of Bedside Cardiac Assessment

beyond facts to gain deep understanding that can then be applied in new contexts.<sup>8</sup> In particular, TfU helps educators engage students in challenging learning experiences that help build and demonstrate their understanding. Three other principles of TfU help educators identify topics, concepts, and skills that are worth understanding; define overarching, long term understanding-goals or “throughlines” and frame sub-goals focused on the most important aspects of those topics; and develop assessment practices that deepen student understanding. The curriculum’s constructivist undergirding is further supported by adult, experiential, and transformational learning theories.<sup>6</sup>

Within the CBME framework, the abilities of a professional progress along a spectrum from novice to expert.<sup>3</sup> We used conceptual change theory to foster the development of expertise, generating dissatisfaction with learners’ current conceptions and skills, ensuring that new material was both understandable and plausible, and creating the expectation that the time invested would be fruitful.<sup>9</sup> We emphasized causal relationships, another hallmark of expertise development,<sup>10</sup> to further help learners process patterns more efficiently. Finally, we applied principles of effective multimedia design<sup>11</sup> and strategies to manage cognitive load.<sup>12</sup>

To develop the flipped class curriculum, we developed pre-class assignments with short videos, and developed in-class activities and a facilitator guide (see Table 1). In the first video, a patient unexpectedly asked the viewer, “Why should I trust your clinical skills?” followed by statements by the onscreen instructor about the importance of patient communication skills. Two, one-hour class sessions followed, including a large-group discussion about the patient’s startling question and simulated patient encounters in which understanding the patient’s perspective was central to effective, pre-procedural communication. In the class sessions, students also engaged

## Entrusting “Attitudes” in the K/S/A of Bedside Cardiac Assessment

in JVP measurement exercises and a team game in which students identified heart sounds in various clinical contexts.

### **Evaluation strategy**

We implemented the integrated curriculum at Boston University Medical Center (BUMC, Massachusetts USA), Kansas University Medical Center (Kansas USA), Central Clinical School Monash University (Australia), and Tan Tock Seng Hospital (Singapore). To better understand learners’ experiences, we surveyed the third-year students on internal medicine rotation at BUMC.

From November 2017 to June 2018, we asked participants to complete a post-class survey with open-ended questions. After the first classroom session, we surveyed students about their experiences with the pre-class assignments and the session. After the second session, we surveyed students about their experiences in that session and the curriculum as a whole. Because the survey questions varied slightly from site to site, content analysis<sup>13(p7)</sup> allowed us to group the survey questions into two categories, those related to successful learning and those related to opportunities for improvement (see Table 2).

We then analyzed the responses using a sequence of content analysis and then thematic analysis.<sup>13</sup> Applied Thematic Analysis<sup>13(p15-17)</sup> approach was implemented in which two researchers (DN, IO) engaged the separated data sets independently using an initial open coding strategy. Codes were developed using a constant comparison methodology, and we developed the final codebook based on consensus discussions to resolve differences. A third researcher (JM) served as arbiter to facilitate differences in perspectives. A re-examination of the codes in context resulted in the emergence of themes, reported below.



## Entrusting “Attitudes” in the K/S/A of Bedside Cardiac Assessment

### OUTCOMES

There were 489 short answer questions presented within the surveys, of which 61.6% (n=301) were analyzed. The remaining 38.4% (n=188) were blank or unintelligible. There was a 75.4% (n=159/211) completion rate for questions related to “Successful Learning” and a 51.1% (n=142/278) completion rate for questions related to “Opportunities for Improvement.” First-round coding agreement rate was 54.8% (n=165/301). All coding disagreements were resolved by discussion resulting in consensus, except for 3.7% (n=11/301), which required arbitration. Thus, common definitions of codes emerged easily, resulting in effective codebooks (see Table 3).

The emergent codes clustered around various themes in each category. Successful Learning themes centered around effective learning strategies and meaningful peer encounters, skills practice, and educator encounters (see Table 4). Sample comments representing the Successful Learning codes included:

“The pre-class videos were helpful because they got me thinking what we learned today ahead of time. (code VHL, Participant 1129-08),”

“I like the standarized [sic] approach to the cardiac exam (SAE, 120-16),”

“...I prefer to make mistakes in the simulated environment and a little more effective [sic] with active patients (SAE, 1214-10),” and

“Showing examples of approaches to different patients” (ATP, 1206-06).

The last two responses also exemplified concepts of a transition to recognizing that holistic care was dependent on effective communication with the patient.

Interactions with instructors and peers were valued as contributing to learning as seen here:

## Entrusting “Attitudes” in the K/S/A of Bedside Cardiac Assessment

“The interactive aspect of the in-class activities helped [learning],” (IWV, 1129-11)

“In person demonstration...,” (DOE, 1129-02)

“Interactive exercises,” (IWV, 1129-10), and

“Good teachers.” (GTE, 1129-10)

Each of these quotes contributes to an overarching concept, the importance of learning beyond the knowledge and skills domains, affirming the importance of attitudinal aspects of the development of clinical abilities and the meaningfulness of human interaction while learning.

The Opportunities for Improvement themes focused on instructional design improvements, individual learning preferences, instruction related improvements, and general comments regarding how no improvement was needed (see Table 5). Sample comments representing the Improvement codes included:

“Hard to watch videos while in a busy Med service, this would have been more useful in 2nd year when we were learning about physical exam (WPC, 1129-05)” and

“... Why should I trust clinical skills likely more relevant of a discussion start of 3rd year (WPC, 0411-11).”

Perspectives varied widely on not just the sequence but also the presentation of the concepts within the overall medical school curriculum. This was exemplified by one student’s comment on individual learning preferences and expectations, “The variety of teaching methods used in each session (MMT, 0411-01),” under the Successful Learning category.

These emergent themes became the basis for our understanding of the learning experiences, as we discuss next.

## Entrusting “Attitudes” in the K/S/A of Bedside Cardiac Assessment

### DISCUSSION

In this paper, we introduce the concept of integrating entrustability into competency development, emphasizing the sometimes-forgotten attitudinal or affective domain of teaching and learning. We used cognitive science-based instructional design to weave together threads of knowledge and skill development, notions of trust, and communication with patients, to create a curriculum that learners experienced as meaningful. A holistic, effective learning experience like the *Listen Before You Auscultate* curriculum may make it more likely that learners will transfer new competencies to the workplace, further strengthening the fabric of CBME.

Two throughlines in the TfU framework, attitudinal aspects of the development of clinical abilities and the development of learners’ diagnostic reasoning, particularly supported this approach. As an attitudinal, meaning-making concept, entrustability presumes that understanding, or at least trying to understand, a patient’s feelings, intentions, and assumptions (and perhaps culture, race, class, or gender) is necessary for transformative learning to occur.<sup>6</sup> The development of diagnostic reasoning is central to the progression of expertise, so we designed the assignments and activities to enable participants to learn and practice tools such as hypothesis testing and pattern recognition.

Thematic analysis suggested that the learning strategies were effective and that peer encounters, skills practice, and encounters with educators were meaningful. Learners affirmed the implicit value of integrating human interaction, and thus learning in the “attitudes” domain, as contributing to successful learning. The analysis captured experiences that have the potential to help transition learning from a solely transactional approach to one “...where the consequent personal transformation on the part of students can actually lead to wider, positive social

## Entrusting “Attitudes” in the K/S/A of Bedside Cardiac Assessment

transformation.”<sup>6</sup> The analysis also revealed opportunities to improve the original instructional design, which will be incorporated into future iterations.

Additionally, classroom facilitators observed improved transfer of knowledge from classroom to workplace, an expected benefit of the TfU approach. For example, prior to the class sessions, students expressed little confidence in their JVP measurement skills. At the second session, most reported having measured their patients’ JVPs over the preceding week.

### **Limitations**

Given the use of the content analysis approach and inability to explore further the emergent themes from the limited data set, the instructional design’s generalizability to learners in other health professions education programs is limited and may require further study. Further, this dataset was based on responses to similar but not identical survey questions, which may have introduced an unintended bias which would require further study.

We conceptualized entrustability as part of an attitudinal aspect of a competency but acknowledge that it could also be viewed as a construct that is challenging to measure.<sup>2</sup> Similarly, while our explicit incorporation of notions of trust in the curriculum<sup>1</sup> aligns with students’ desire to be introduced early to the CEPAERs framework,<sup>14</sup> future concept or outcome analyses are needed to clarify the value of incorporating elements of entrustment beyond their well-established roles in assessment. Finally, as CBME’s shared language evolves,<sup>3</sup> we acknowledge the inherent ambiguity of such terms as trust, trustworthiness and entrustability.

### **Next Steps**

We will make the curriculum widely available and continue to study its impact on learners’ BCA-related knowledge, skills, and attitudes, entrustability as a construct, and transfer. We hope that thoughtful design of curricula that foster learners’ entrustability and attitudinal

## Entrusting “Attitudes” in the K/S/A of Bedside Cardiac Assessment

growth will promote development beyond traditional knowledge and skills, and that this exploratory work will stimulate conversations around expanded roles of trustworthiness and entrustability in medical education.

## Entrusting “Attitudes” in the K/S/A of Bedside Cardiac Assessment

### **ACKNOWLEDGEMENTS**

The study team wishes to thank the many people who were integral to the success of this project, especially the students who learned with us, Sonia Ananthakrishnan, Warren Hershman, Kelly Ho, and David Flynn at the Boston University Medical Center (BUMC). Thanks to Tina Grotzer, Flossie Chua, and Bryan Mascio at the Harvard Graduate School of Education, Vlad Valtchinov at Harvard Medical School, and Maria Romero at VA Bedford Healthcare System. We gratefully acknowledge the work of the late Dr. Michael S. Gordon at the University of Miami Miller School of Medicine for teaching auditory heart sounds mnemonics and Dr. W. Proctor Harvey’s “5-Finger Approach” to cardiac assessment, from which was adapted the 6-Step Systematic Approach to Bedside Cardiac Assessment.

### **FUNDING/SUPPORT**

An Education Pilot grant from the BUMC Faculty Development Committee funded part of this study. Our work was also partially supported with resources from VA Bedford, VA Boston, and the New England Geriatric Research Education and Clinical Center.

### **OTHER DISCLOSURES**

None.

### **ETHICAL APPROVAL**

The Boston University Medical Center Institutional Review Board (IRB) reviewed the research and made the determination that it was not human subjects research and therefore had no requirement to obtain consent, IRB Number: H-42353, Jan. 10, 2022. This work was reviewed by the VA Bedford Healthcare System IRB and determined not to require its oversight.

## Entrusting “Attitudes” in the K/S/A of Bedside Cardiac Assessment

### **DISCLAIMERS**

Views and content are those of the authors and do not reflect the official policy or position of VA or any agency of the United States Government.

### **PREVIOUS PRESENTATIONS**

Early versions of the curriculum and proposed evaluation strategy were presented in poster format:

Meisel JL, Chen D, March G, Bernard SA, Carmona H, Petrosa E, Papps N.

Building competence – an active-learning approach. Alliance for Academic Internal Medicine. Academic Medicine Week (2018). San Antonio TX, USA.

Meisel JL, Chen D, March G, Bernard SA, Carmona H, Papps N. Building competence and confidence in clinical skills: a systematic, flipped classroom approach to learning bedside cardiac assessment. Northeast Group on Educational Affairs Annual Conference (2017). University of Rochester School of Medicine and Dentistry. Rochester NY, USA.

## Entrusting “Attitudes” in the K/S/A of Bedside Cardiac Assessment

### REFERENCES

1. AAMC. Core EPAs guiding principles. AAMC. Accessed 4/1/2021, <https://www.aamc.org/what-we-do/mission-areas/medical-education/cbme/core-epas/guiding-principles>
2. ten Cate O. Competency-based postgraduate medical education: past, present and future. *GMS J Medical Educ.* 2017;34(5):Doc69-Doc69. doi:10.3205/zma001146
3. Englander R, Frank JR, Carraccio C, Sherbino J, Ross S, Snell L. Toward a shared language for competency-based medical education. *Med Teach.* 2017;39(6):582-587. doi:10.1080/0142159X.2017.1315066
4. Lekic M, Lekic V, Riaz IB, Mackstaller L, Marcus FI. The cardiovascular physical examination - is it still relevant? *Am J Cardiol.* 2021;149:140-144. doi:10.1016/j.amjcard.2021.02.042
5. Thompson WR. In defence of auscultation: a glorious future? *Heart Asia.* 2017;9(1):44-47. doi:10.1136/heartasia-2016-010796 [Replace with MedEdPORTAL citation]
6. Chaves C. Adult learners and the dialectical process: a validating constructivist approach to learning transfer and application. *Online Journal of Workforce Education and Development* 2008;3(1)
7. *Listen Before You Auscultate* title is original, also used by Cadore B in *With Him: Listening to the Underside of the World*. Bloomsbury Publishing Plc; 2020. p. 26
8. Wiske MS. What is teaching for understanding? *Teaching for Understanding: Linking Research with Practice*. 1st ed. ed. Jossey-Bass Publishers; 1998:chap 3
9. Strike KA, Posner GJ. A conceptual change view of learning and understanding. In: Pines AL, West LHT, eds. *Cognitive Structure and Conceptual Change*. Academic Press; 1985:211-231
10. Grotzer T. *Learning Causality in a Complex World : Understandings of Consequence*. Rowman & Littlefield Education; 2012
11. Clark RC, Mayer RE. *E-learning and the Science of Instruction: Proven Guidelines for Consumers and Designers of Multimedia Learning*. Fourth edition. ed. Wiley; 2016 [Replace with MedEdPORTAL citation]
12. Van Merriënboer JJG, Sweller J. Cognitive load theory in health professional education: design principles and strategies. *Med Educ.* 2010;44(1):85-93. doi:10.1111/j.1365-2923.2009.03498.x [Replace with MedEdPORTAL citation]
13. Guest G. *Applied Thematic Analysis*. Sage Publications; 2012.
14. Geraghty JR, Ocampo RG, Liang S, et al. Medical students' views on implementing the core EPAs: recommendations from student leaders at the core EPAs pilot institutions. *Acad Med.* Feb 1 2021;96(2):193-198. doi:10.1097/acm.0000000000003793



## Entrusting “Attitudes” in the K/S/A of Bedside Cardiac Assessment

### Figure

Concept of entrustability as a central element of both competencies and entrustment decision-making in competency-based medical education

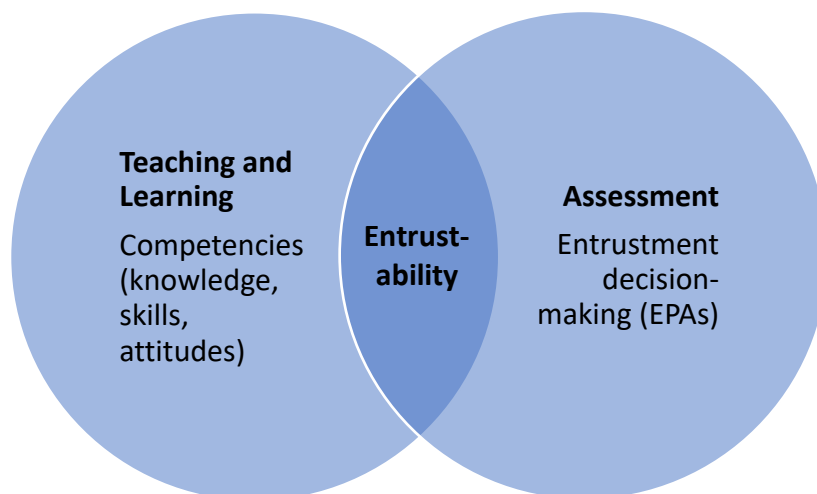

Abbreviation

EPAs: entrustable professional activities

## Entrusting “Attitudes” in the K/S/A of Bedside Cardiac Assessment

**Table 1**

*Listen Before You Auscultate* bedside cardiac assessment curriculum

| <b>Complete Learning Sets A-F<br/>Before Classroom Session 1</b> |                                              |                                     |                                    |                       |                                          |
|------------------------------------------------------------------|----------------------------------------------|-------------------------------------|------------------------------------|-----------------------|------------------------------------------|
| A                                                                | B                                            | C                                   | D                                  | E                     | F                                        |
| “Why Should I Trust Your Bedside Cardiac Skills?”                | Overview of Bedside Cardiac Assessment (BCA) | Look at the Patient, Feel the Heart | Right Heart Assessment Parts 1 & 2 | Left Heart Assessment | Diagnostic Reasoning Tips from Us to You |

  

| <b>Complete Learning Sets G-M<br/>Before Classroom Session 2</b> |                  |                                         |                                    |                            |                                 |                                  |
|------------------------------------------------------------------|------------------|-----------------------------------------|------------------------------------|----------------------------|---------------------------------|----------------------------------|
| G                                                                | H                | I                                       | J                                  | K                          | L                               | M                                |
| Listen to the Heart: Left Ventricular Gallops                    | Systolic Murmurs | Diastolic Murmurs: Aortic Regurgitation | Diastolic Murmurs: Mitral Stenosis | Basic Confirmatory Studies | Heart Sounds Practice & Summary | The Cardiac Cycle (Supplemental) |

  

| <b>PARTICIPATE IN IN-CLASS ACTIVITIES</b> |                            |                                    |                                                 |                         |                         |                                    |                                           |                                 |  |
|-------------------------------------------|----------------------------|------------------------------------|-------------------------------------------------|-------------------------|-------------------------|------------------------------------|-------------------------------------------|---------------------------------|--|
| Class Session 1                           |                            |                                    |                                                 |                         | Class Session 2         |                                    |                                           |                                 |  |
| Introduction: BCA and Session 1           | Activity 1: Meet Mr. Smith | Activity 2: Assess the Right Heart | Optional Activity: Question Pool/Muddiest Point | Recap and Looking Ahead | Introduction: Session 2 | Activity 3: Name that Heart Sound! | Activity 4: Simulated Clinical Encounters | Recap: Using BCA as a Clinician |  |

**Abbreviation**

BCA: Bedside Cardiac Assessment

## Entrusting “Attitudes” in the K/S/A of Bedside Cardiac Assessment

**Table 2**

### Question Categories That Resulted from the Grouped Survey Questions

This analysis and categorization was required due to unanticipated variation in the survey questions presented to the students following the activity. See text for details.

| <b>Question Category</b>                 | <b>Grouped Questions (N)</b>                                                                                                                                                                                                          |
|------------------------------------------|---------------------------------------------------------------------------------------------------------------------------------------------------------------------------------------------------------------------------------------|
| Related to Successful Learning           | <ul style="list-style-type: none"><li>• Please identify the most useful aspects of the course so far. (185)</li><li>• What were the most useful takeaways acquired from today’s session? (15)</li></ul>                               |
| Related to Opportunities for Improvement | <ul style="list-style-type: none"><li>• Please identify the least useful aspects of this course so far. (176)</li><li>• What could we do to further improve the pre-class assignments or today’s in-class activities? (121)</li></ul> |

## Entrusting “Attitudes” in the K/S/A of Bedside Cardiac Assessment

**Table 3**  
Codebooks

Codes were developed using a constant comparison methodology, with the final codebook based on consensus discussions. Third year students on internal medicine rotation, Nov. 2017 - June 2018. Boston University Medical Center, Massachusetts USA. See text for details.

| Successful Learning Codebook |                                   |                                                                                                                           | Opportunities for Improvement Codebook |                                           |                                                                                                                           |
|------------------------------|-----------------------------------|---------------------------------------------------------------------------------------------------------------------------|----------------------------------------|-------------------------------------------|---------------------------------------------------------------------------------------------------------------------------|
| Code                         | Full Name                         | Description                                                                                                               | Code                                   | Full Name                                 | Description                                                                                                               |
| BLK                          | BLanK                             | Nothing written in - No response to assigned question                                                                     | BLK                                    | BLanK                                     | Nothing written in - No response to assigned question.                                                                    |
| UND                          | UNDecipherable                    | Comments could not be read interpreted from written form.                                                                 | NIN                                    | No Improvement Needed                     | Indicated that no improvements were identifiable for the session.                                                         |
| GTE                          | Great TEachers                    | Non-specific recognition that the qualities of the instructor enhanced the learning experience.                           | UND                                    | UNDecipherable                            | Comments could not be read interpreted from written form, or responded as "not sure."                                     |
| STS                          | Seeing The Sign                   | Learning was enhanced by actually seeing the physical sign or observation on a real person.                               | SUS                                    | Poor Teaching/ Scaffolding not sufficient | Instructors did not create effective learning environments or were lacking in some way.                                   |
| GEP                          | Graphic Explaining Physiology     | Learning was enhanced by a diagram or graphic of the physiology, pathophysiology, or exam technique.                      | WPC                                    | Wrong Place in Curriculum                 | Participant indicated that this session would have been more meaningful either earlier or later in the curriculum         |
| RHS                          | Recorded Heart Sounds             | Discussion of recordings with attention to each sound's characteristics and differentiation was helpful.                  | NEF                                    | Not Enough Feedback                       | Wanted more opportunity to get feedback of own understanding and skills.                                                  |
| DOE                          | Demonstration of Exam             | Watching a demonstration of the exam with explanations of the technique was helpful.                                      | DNH                                    | Discussion Not Helpful                    | Discussion of one or more topics was seen as not contributing to effective learning.                                      |
| SAE                          | Systematic Approach to Exam       | Provided with a systematic plan to proceed through the steps of the examination                                           | NET                                    | Not Enough Time to think                  | Wanted more time to understand what was being presented.                                                                  |
| OTP                          | Opportunity To Practice           | Learned better because of the opportunity to practice each skill repeatedly as needed.                                    | STD                                    | Steps Too Dense                           | Too much being taught at one time. More complexity than could be managed as learner.                                      |
| VEP                          | Verbal Explanation of Procedure   | Verbal explanation or review of the skill or procedure was helpful. Explanations coded as this unless noted as "Feedback" | NEP                                    | Not Enough Practice                       | More time practicing skills was desired to gain competency and to meet objectives.                                        |
| OFF                          | Opportunity For Feedback          | Session was valuable because of the opportunity to get feedback on own practice and performance.                          | BSC                                    | Bed-Side Copy was desired                 | Participant wanted pdf or other portable version of the materials to be able to carry to the bedside for clinical use.    |
| IWV                          | Interactions Were Valuable        | General comment about "interactions" as being valuable. Otherwise not specified.                                          | ENH                                    | Exercise or activity Not Helpful          | A specific activity, practice, or game was not seen as supporting learning and worth the time.                            |
| VHL                          | Video Helped Learning             | Watching the video assisted in the broader understanding or specific application of the skill.                            | PRB                                    | Pre-Readings/videos were Burdensome       | The excess of pre-class requirements was not helpful. Not enough time to prepare. Too many places to find required items. |
| AAF                          | Assessment As Feedback            | Mentioned the use of a structured assessment to better understand own skill level.                                        | ANH                                    | Aids were Not Helpful                     | Something about mnemonics, graphic, or recordings were not conducive to better understanding of the skill.                |
| SIM                          | SIMulation was valuable           | Simulation was identified as "useful aspect" of the sessions.                                                             | VNH                                    | Videos were Not Helpful                   | For what ever reason, the content of the videos were identified as least helpful to learning.                             |
| DEB                          | DEBriefing was valuable           | Post-simulation discussion or debriefing was seen as facilitating learning.                                               | NEV                                    | Not Enough Videos                         | Session could have been improved by additional similar videos.                                                            |
| TWH                          | Topic Was Helpful                 | Topic was named in response to a positive question.                                                                       | SNH                                    | Simulation Not Helpful                    | Did not find the simulation experience or debriefing helpful, including needing more structure.                           |
| TNH                          | Topic was Not Helpful             | Topic was named in response to a negative question.                                                                       | FPP                                    | Faster Pace Preferred                     | Session had too much repetition or could have moved faster.                                                               |
| ATP                          | Approach To Patient               | Learning was enhanced by situating the skill within a human encounter with the patient.                                   | SUB                                    | SUveys were Burdensome                    | Reported that the surveys were the least helpful for learning.                                                            |
| PRH                          | Pre-session Readings were Helpful | Pre-session materials enhanced learning during the session. Most talked about the "readings."                             | CCN                                    | Clarify Course Navigation                 | Confusing or forgotten instructions                                                                                       |
| MMT                          | MultiModal Teaching               | Specific comments about variety of learning opportunities or teaching methods.                                            |                                        |                                           |                                                                                                                           |
| IDS                          | Improved Diagnostic Skills        | The sessions' activities resulted in improved confidence in own assessment and diagnostic skills.                         |                                        |                                           |                                                                                                                           |

## Entrusting “Attitudes” in the K/S/A of Bedside Cardiac Assessment

**Table 4**

### Themes Related to Successful Learning

Third year students on internal medicine rotation, Nov. 2017 - June 2018  
Boston University Medical Center, Massachusetts USA

| <b>Theme</b> | <b>Full Name</b>               | <b>Description</b>                                                                           | <b>Comments</b>                                                        |
|--------------|--------------------------------|----------------------------------------------------------------------------------------------|------------------------------------------------------------------------|
| ELS          | Effective Learning Strategies  | Session design elements such as audiovisual material and practice opportunities were helpful | Focused on elements of instructional design, not on human interactions |
| MPE          | Meaningful Peer Encounters     | Discussion and practice on/with peers were helpful to learning                               |                                                                        |
| MSP          | Meaningful Skills Practice     | Opportunity to practice and get feedback was helpful to learning                             |                                                                        |
| MEE          | Meaningful Educator Encounters | The in-room faculty were identified as the source of additional benefit                      | Included discussion leading as well as individual encounters           |
| Other        | Other                          | Does not contribute to a theme.                                                              | Either blank or undecipherable                                         |

## Entrusting “Attitudes” in the K/S/A of Bedside Cardiac Assessment

**Table 5**

### Themes Related to Opportunities for Improvement

Third year students on internal medicine rotation, Nov. 2017 - June 2018  
Boston University Medical Center, Massachusetts USA

| <b>Theme</b> | <b>Full Name</b>                  | <b>Description</b>                                                 | <b>Comments</b>                                                      |
|--------------|-----------------------------------|--------------------------------------------------------------------|----------------------------------------------------------------------|
| IDI          | Instructional Design Improvements | Improvements were systems, curriculum, and session design related. | Recommendations could be applied system-wide to the materials        |
| ILP          | Individual Learning Preferences   | Improvements were related to student preferences and needs         | Included comments that might be attributable to learning preferences |
| NIN          | No Improvement Needed             | Answers indicated no adjustments or updates were needed.           | Blanks were not included.                                            |
| IRI          | Instruction Related Improvements  | These were related to the delivery of the experience or session    | Attributable to one instructor. Differentiated from systems issues.  |
| Other        | Other                             | Does not contribute to a theme.                                    | Either blank or undecipherable                                       |
